# Supplementary material
Source: MDPI journal article supplement (https://www.mdpi.com/2073-4344/3/4/839)
Supplement: s1 [file s1]

Supplementary Information

**Figure S1.** 1H NMR Spectra of Zn-2a.


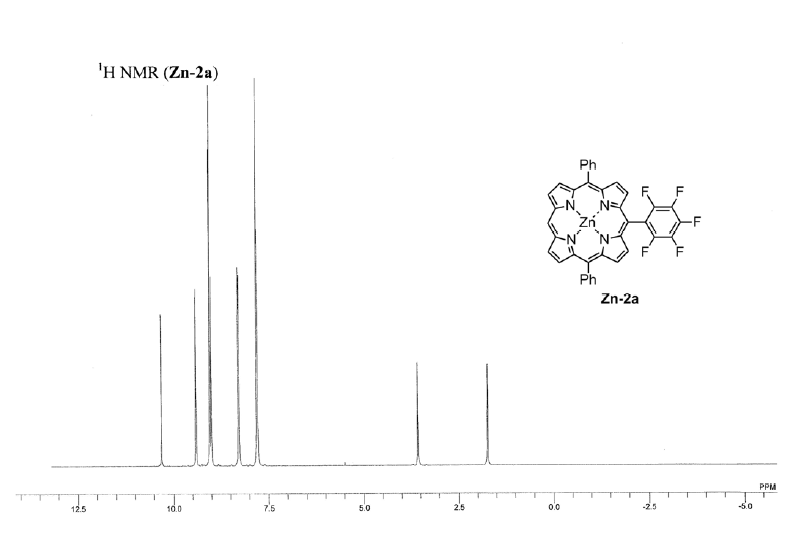


**Figure S2.** 13 CNMR Spectra of Zn-2a.

**
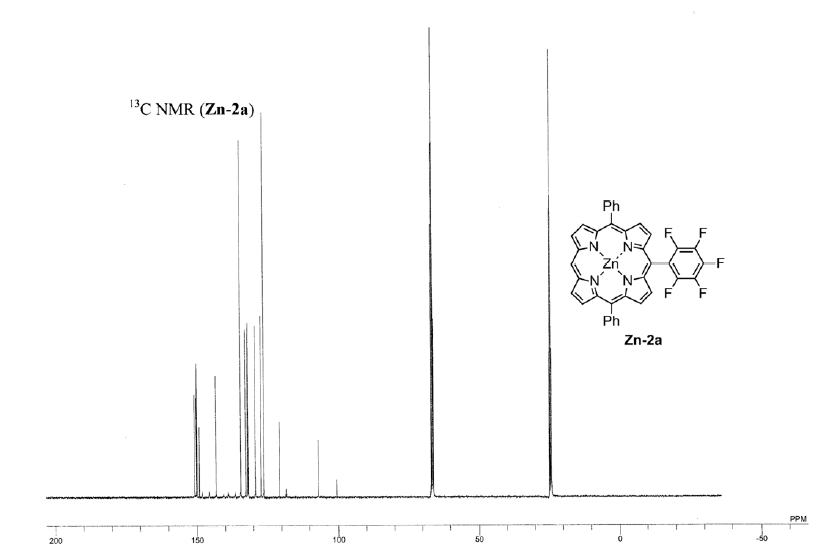
**

**Figure S3.** 19 FNMR Spectra of Zn-2a.


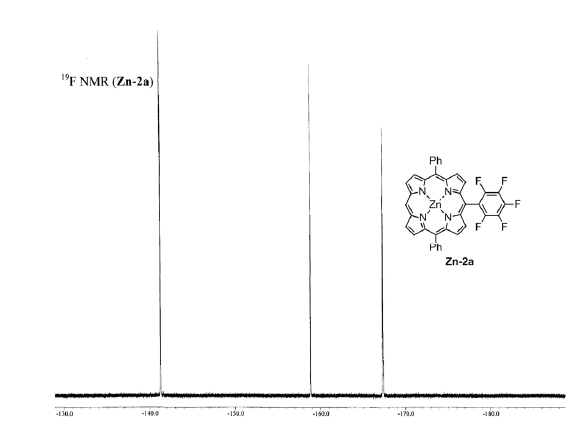


**Figure S4.** 1 HNMR Spectra of Zn-2b.


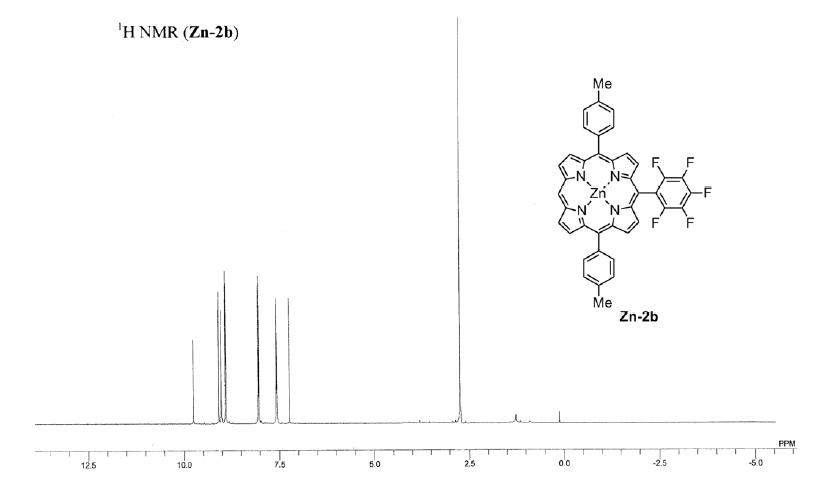


**Figure S5.** 13 CNMR Spectra of Zn-2b.


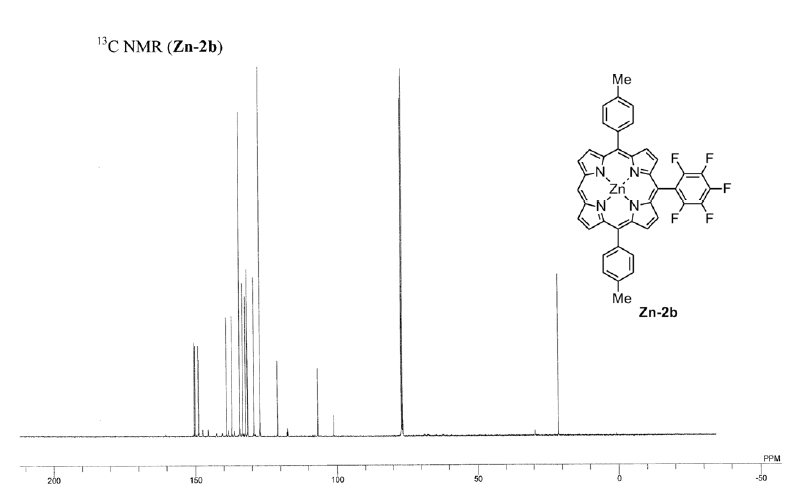


**Figure S6.** 13C NMR Spectra of Zn-2b.


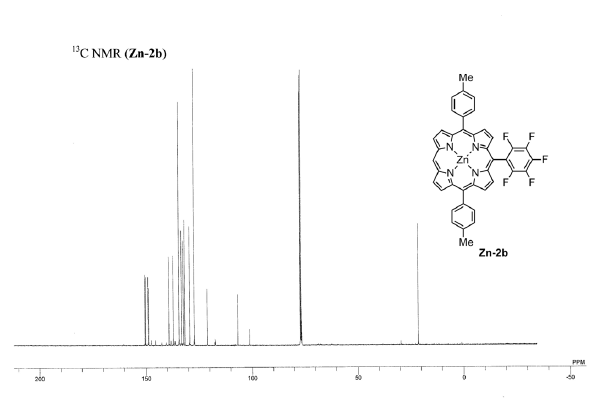


**Figure S7.** 19F NMR Spectra of Zn-2b.


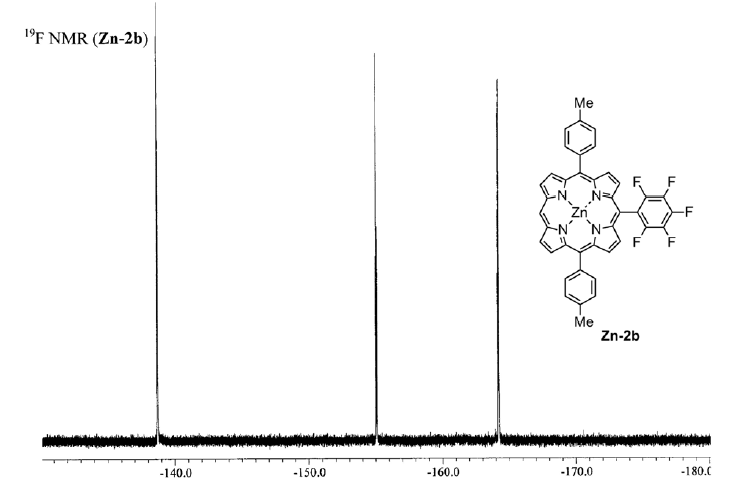


**Figure S8.** 1 HNMR Spectra of Zn-2c.


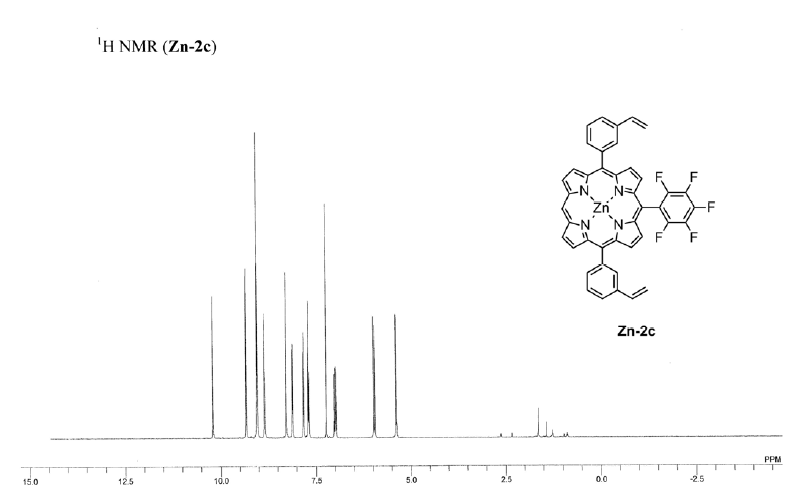


**Figure S9.** 13C NMR Spectra of Zn-2c.


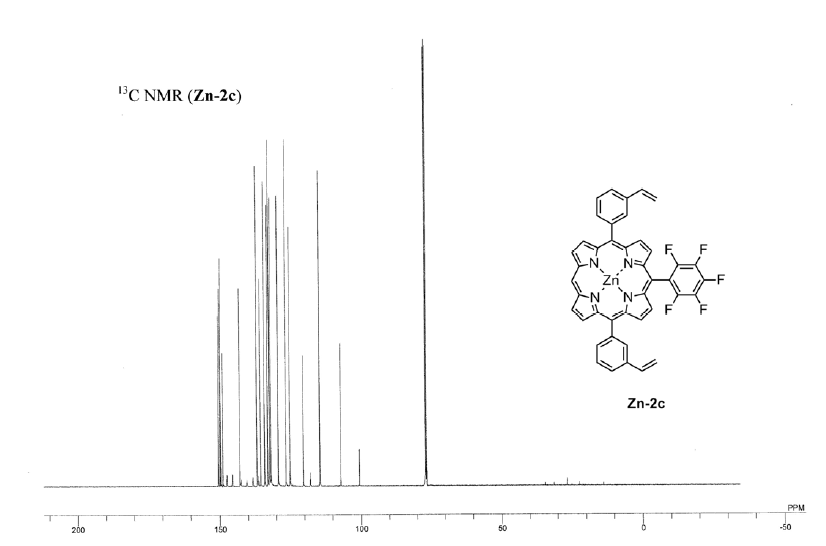


**Figure S10.** 19F NMR Spectra of Zn-2c.


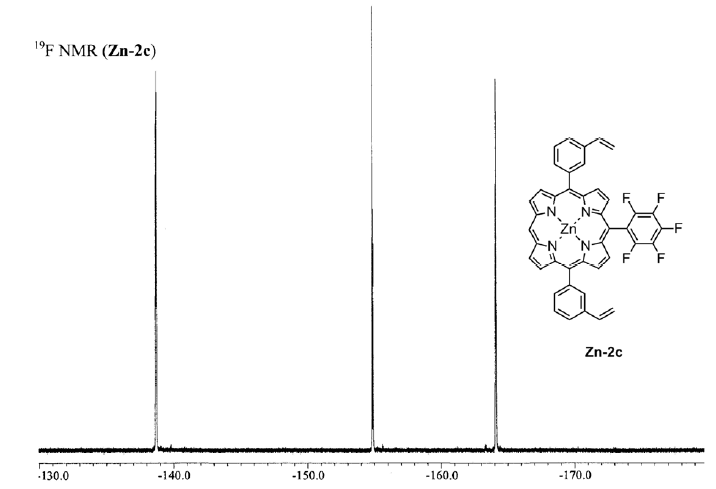


**Figure S11.** 1H NMR Spectra of Zn-2d.


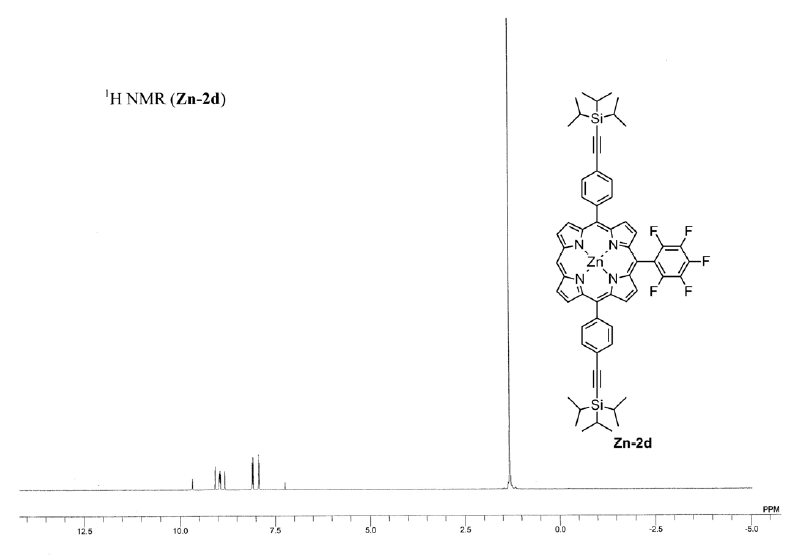


**Figure S12.** 13C NMR Spectra of Zn-2d.


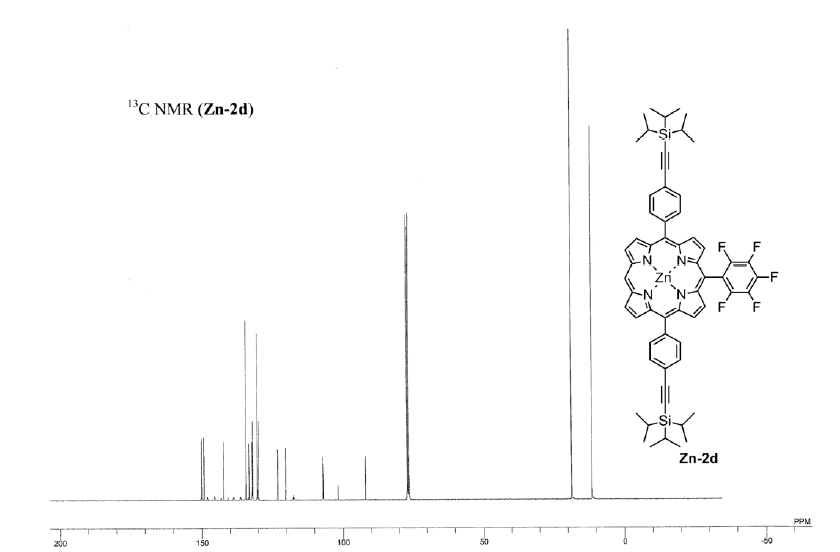


**Figure S13.** 19F NMR Spectra of Zn-2d.


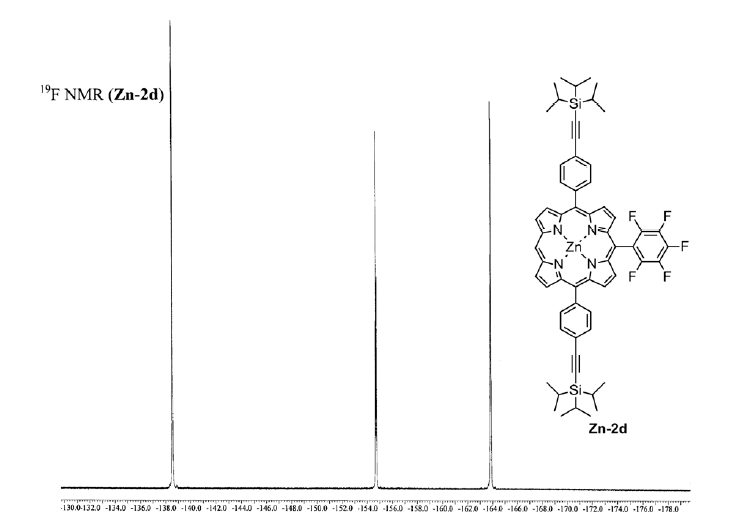


**Figure S14.** 1H NMR Spectra of Zn-2e.


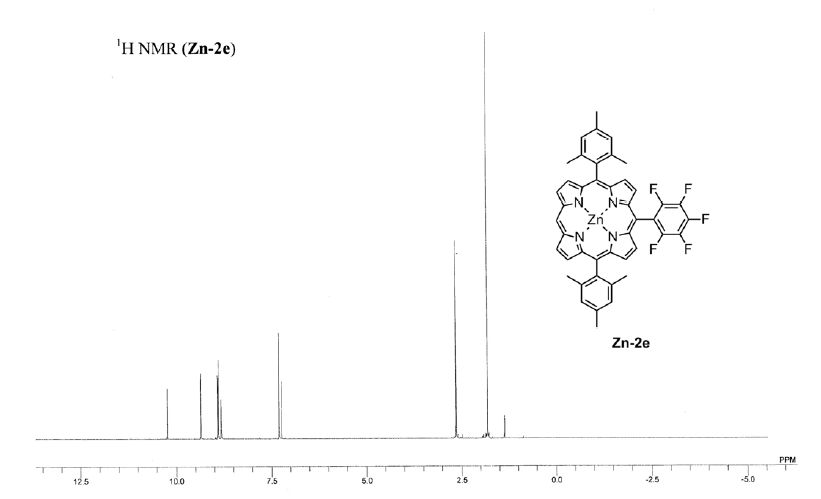


**Figure S15.** 13C NMR Spectra of Zn-2e.


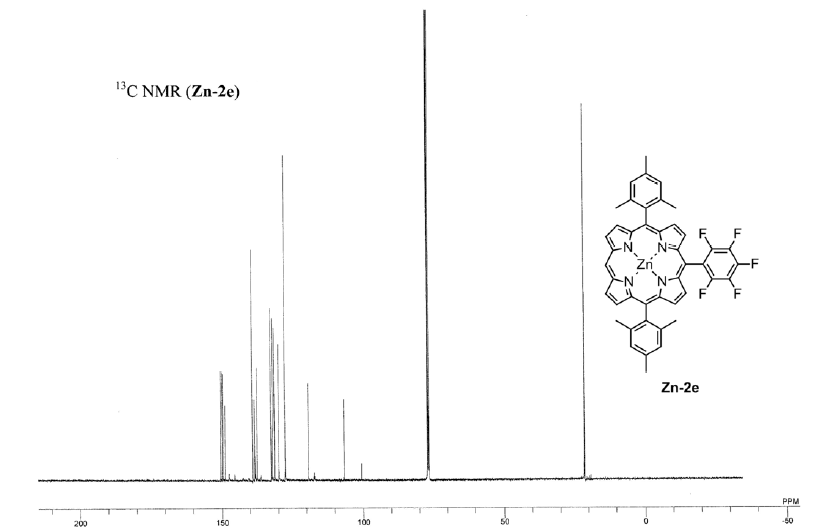


**Figure S16.** 19F NMR Spectra of Zn-2e.


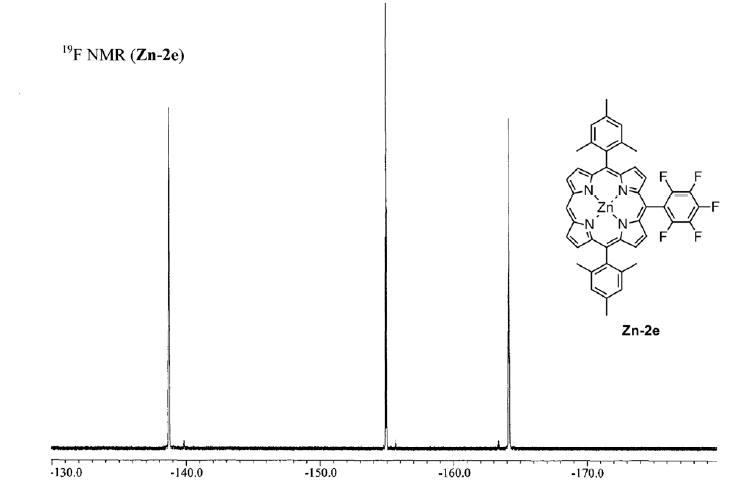


**Figure S17.** 1H NMR Spectra of Zn-2f.


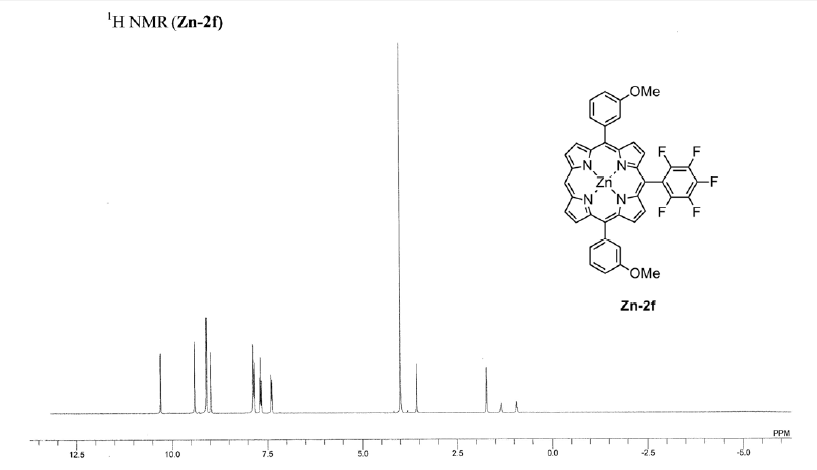


**Figure S18.** 13C NMR Spectra of Zn-2f.


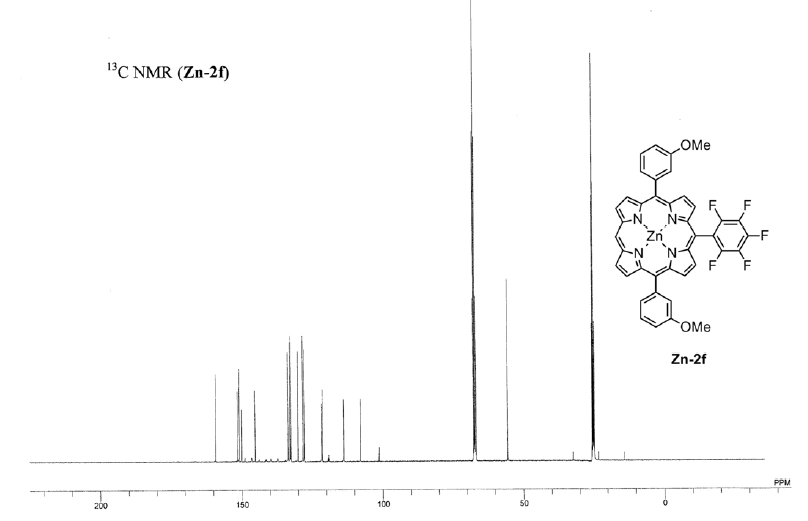


**Figure S19.** 1F NMR Spectra of Zn-2f.


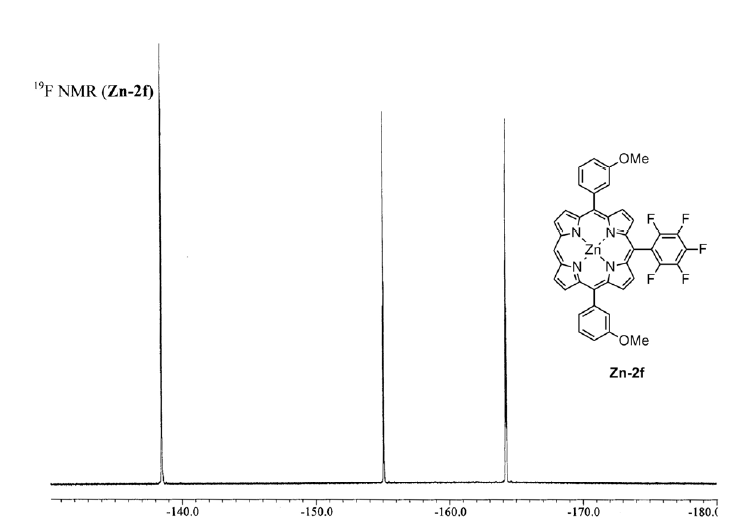


**Figure S20.** 1H NMR Spectra of Zn-2g.


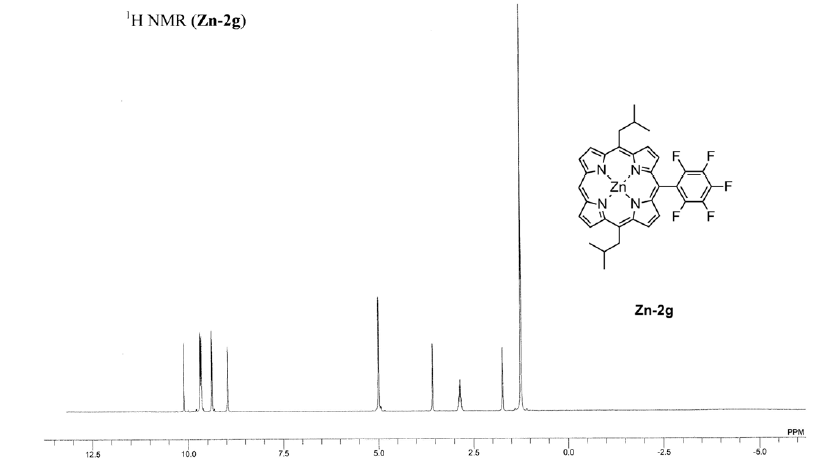


**Figure S21.** 13C NMR Spectra of Zn-2g.


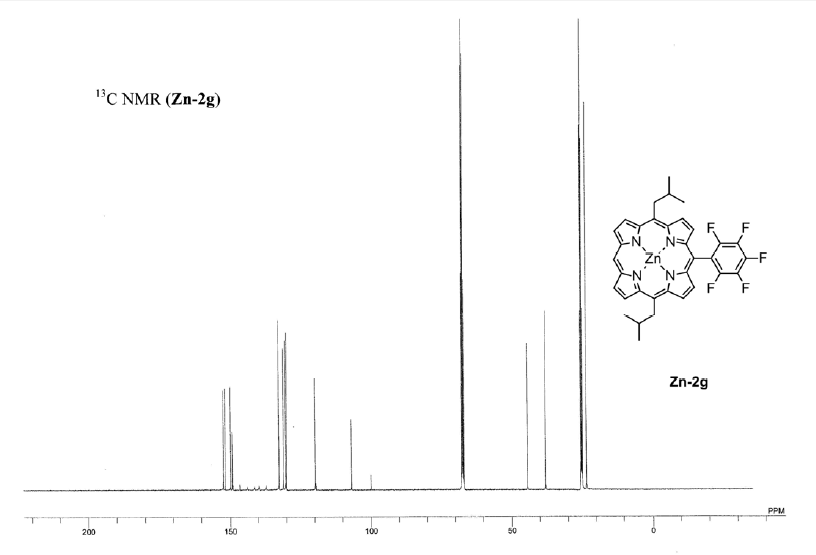


**Figure S22.** 19F NMR Spectra of Zn-2g.


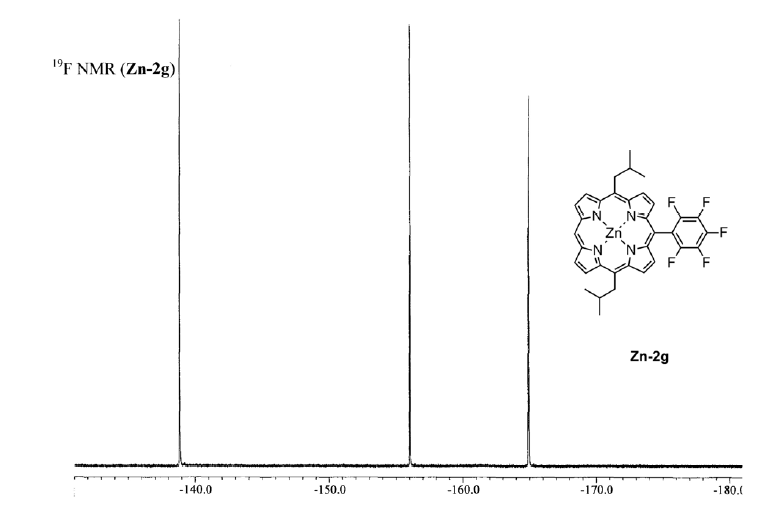


**Figure S23.** 1H NMR Spectra of Zn-2h.


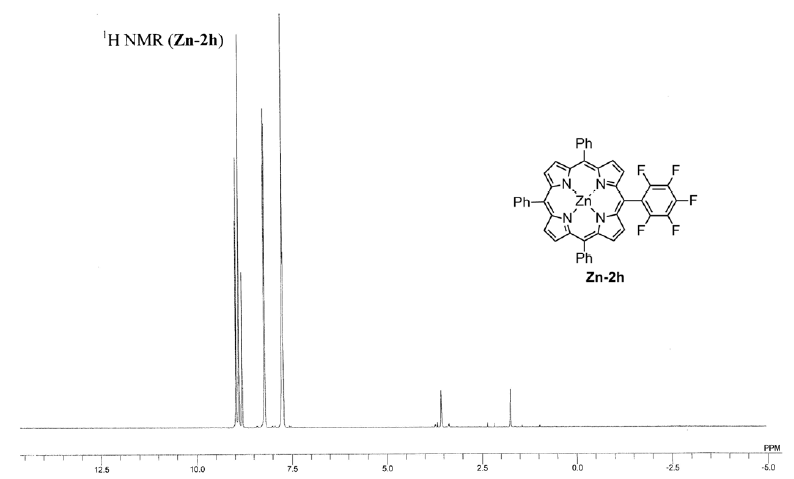


**Figure S24.** 13C NMR Spectra of Zn-2h.


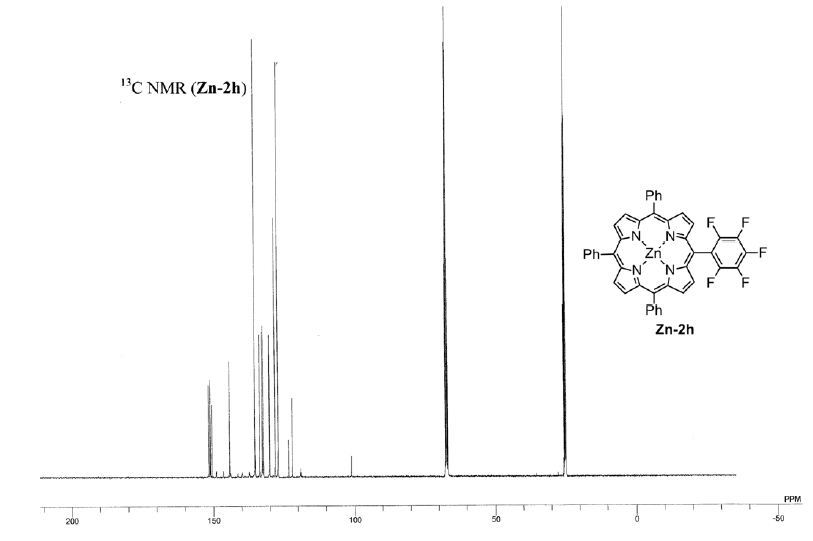


**Figure S25.** 19F NMR Spectra of Zn-2h.


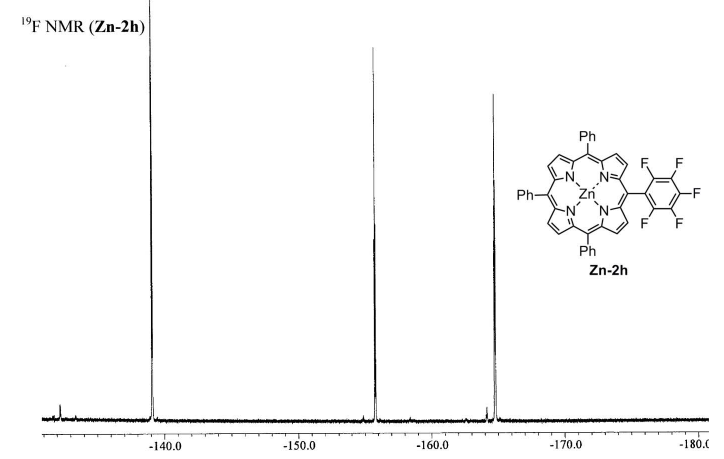


**Figure S26.** 1H NMR Spectra of Zn-2i.


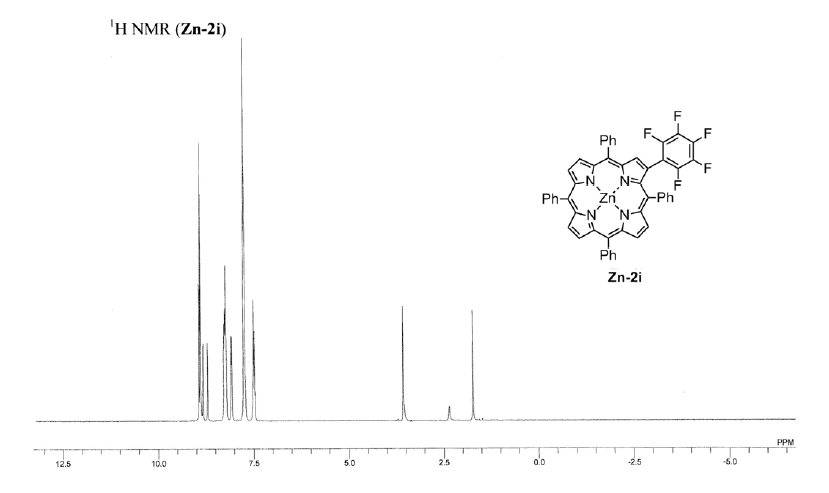


**Figure S27.** 13C NMR Spectra of Zn-2i.


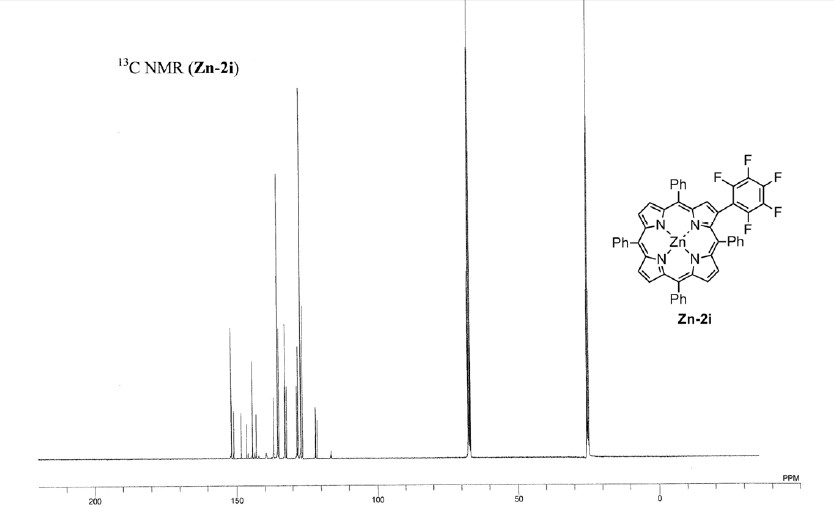


**Figure S28.** 19F NMR Spectra of Zn-2i.


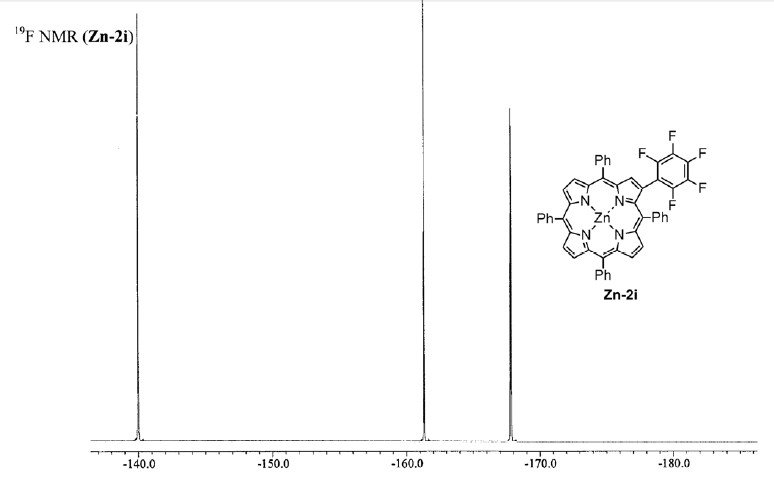


**Figure S29.** 1H NMR Spectra of Zn-2j.


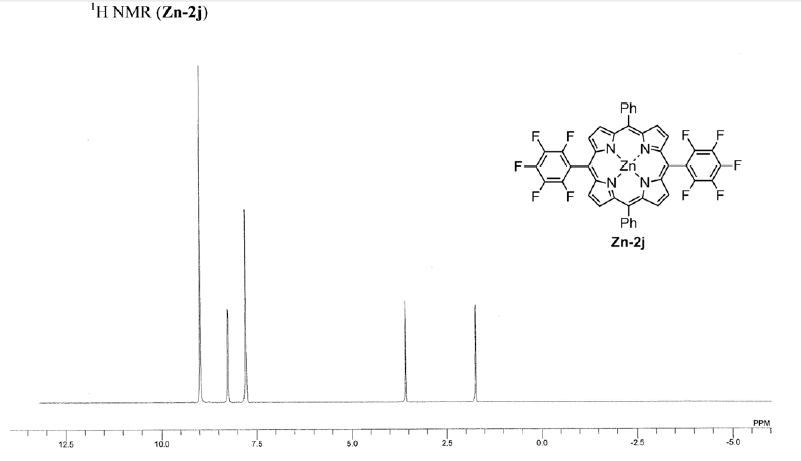


**Figure S30.** 13C NMR Spectra of Zn-2j.

**
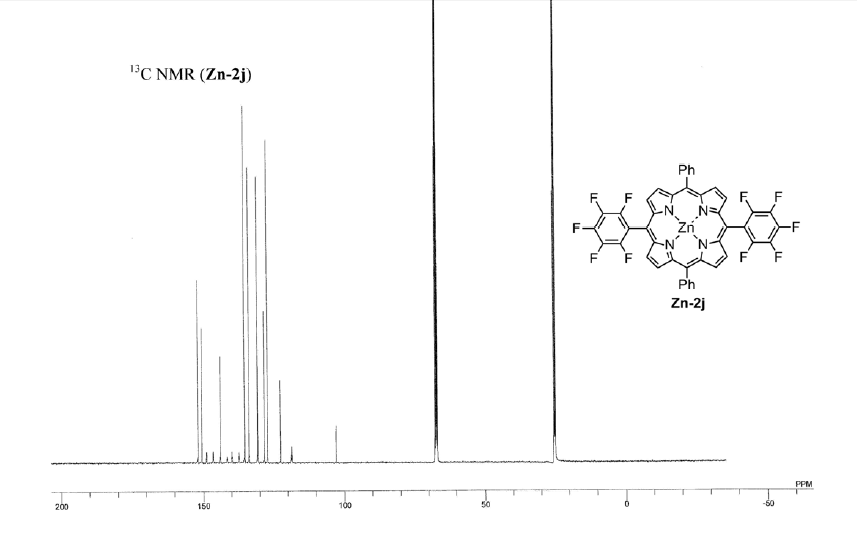
**

**Figure S31.** 19F NMR Spectra of Zn-2j.


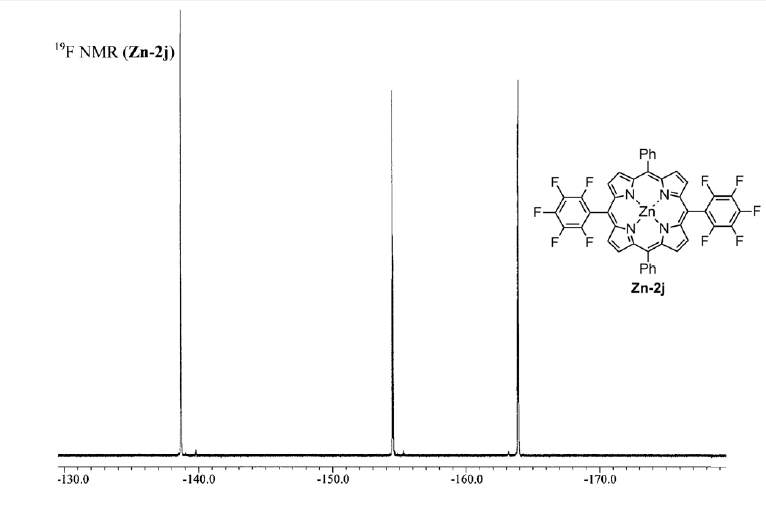


**Figure S32.** 1H NMR Spectra of Ni-2a.


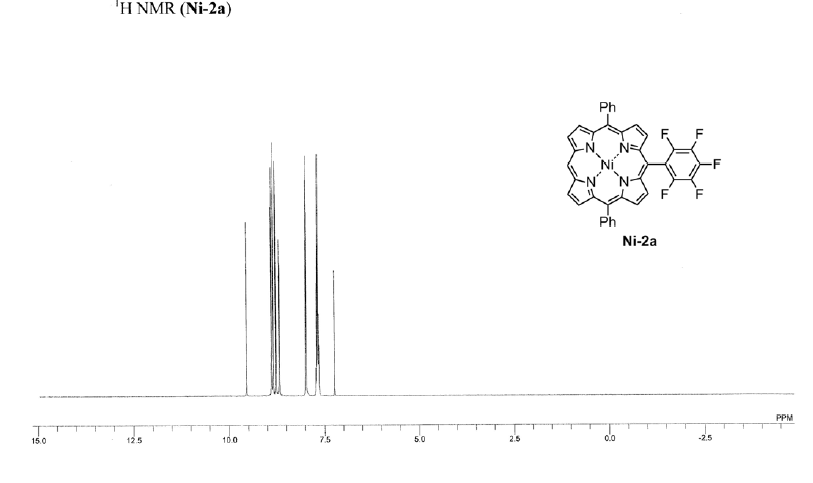


**Figure S33.** 13C NMR Spectra of Ni-2a.


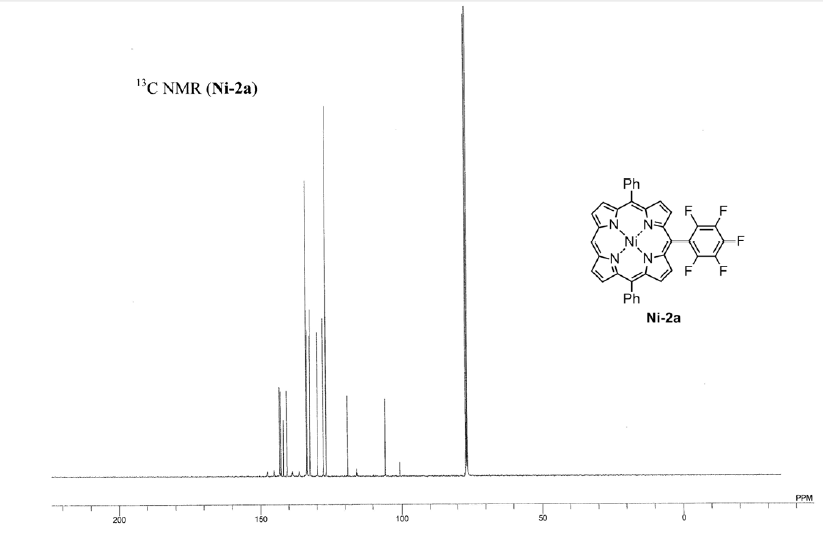


**Figure S34.** 19F NMR Spectra of Ni-2a.


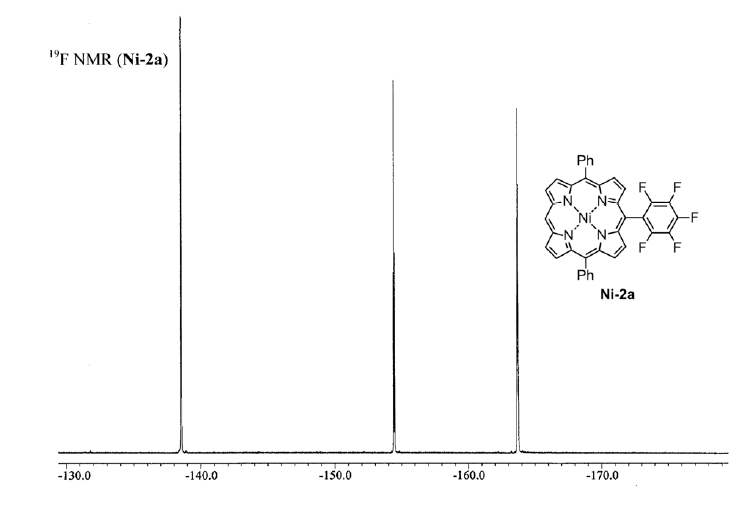


**Figure S35.** 1H NMR Spectra of Zn-3.


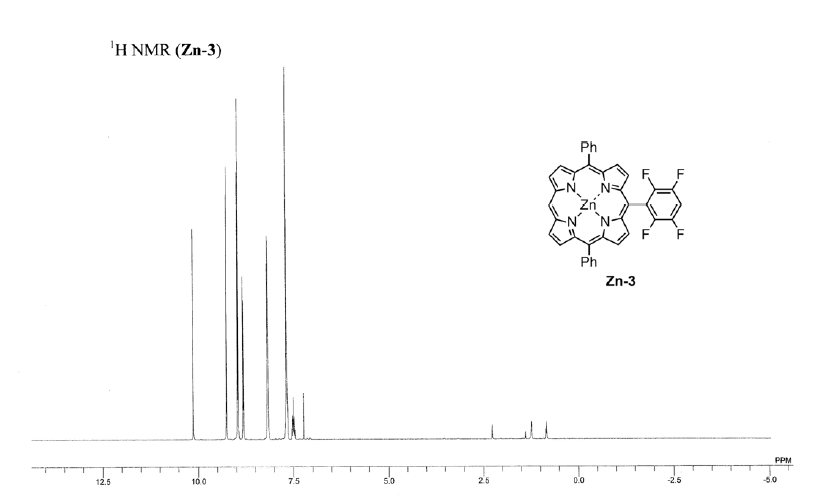


**Figure S36.** 13C NMR Spectra of Zn-3.


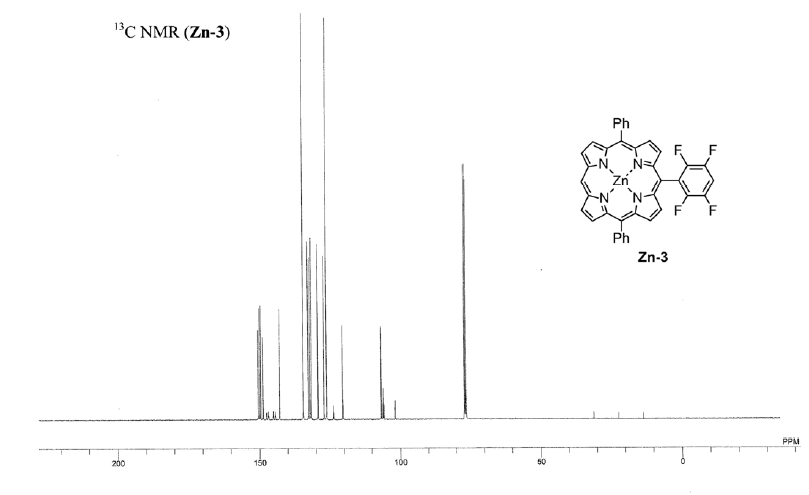


**Figure S37.** 19F NMR Spectra of Zn-3.


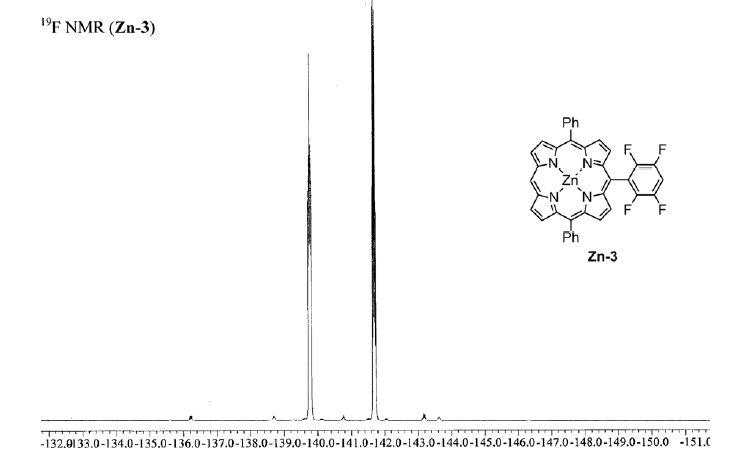


**Figure S38.** 1H NMR Spectra of Zn-4.


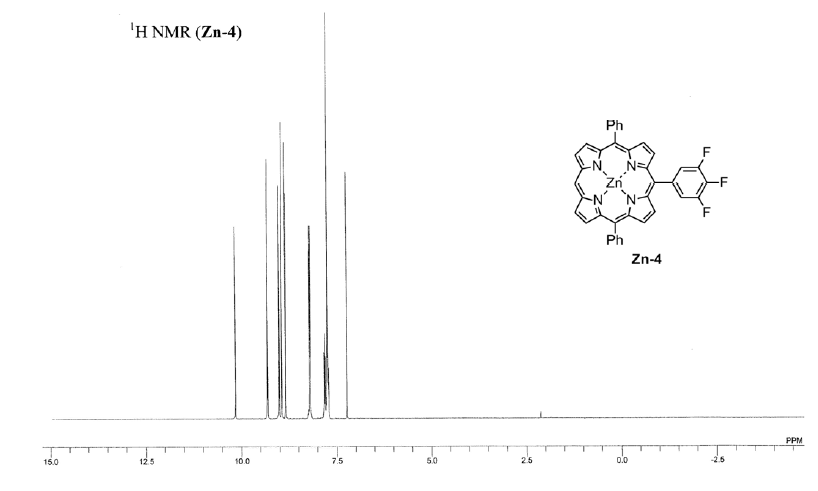


**Figure S39.** 13C NMR Spectra of Zn-4.


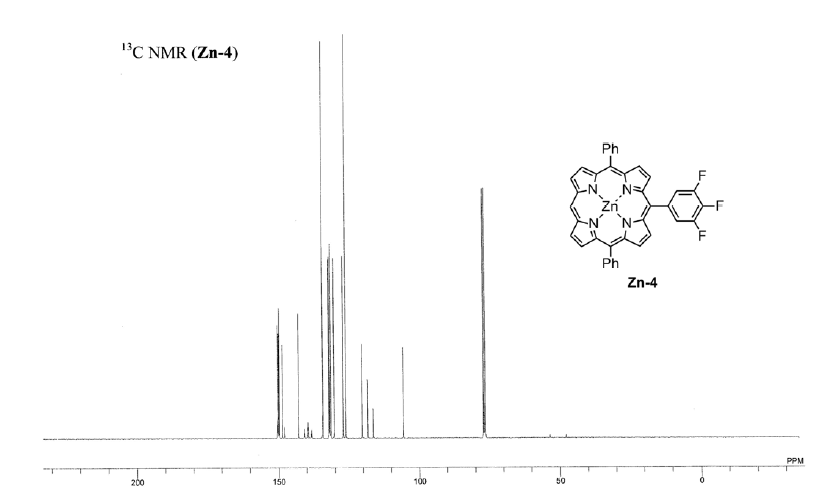


**Figure S40.** 19F NMR Spectra of Zn-4.


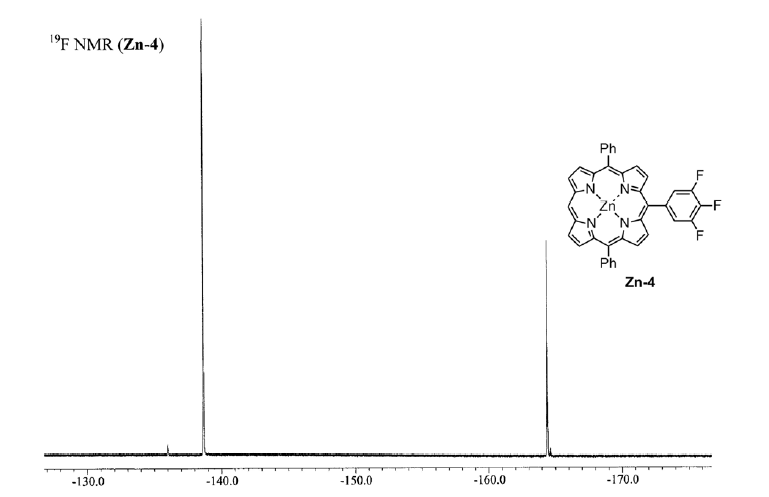


**Figure S41.** 1H NMR Spectra of Zn-5.


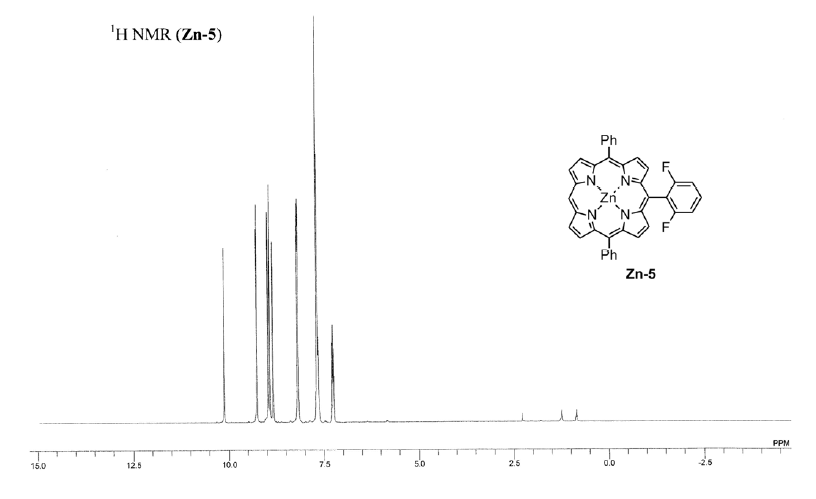


**Figure S42.** 13C NMR Spectra of Zn-5.


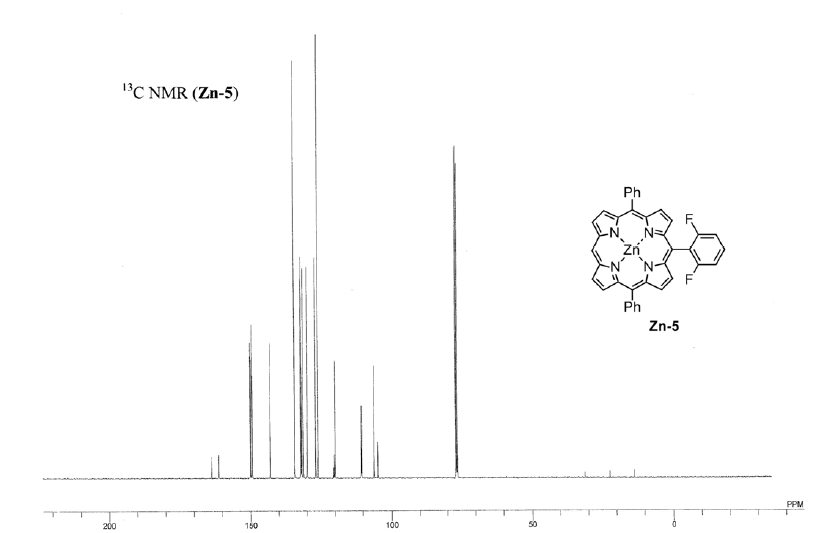


**Figure S43.** 19F NMR Spectra of Zn-5.


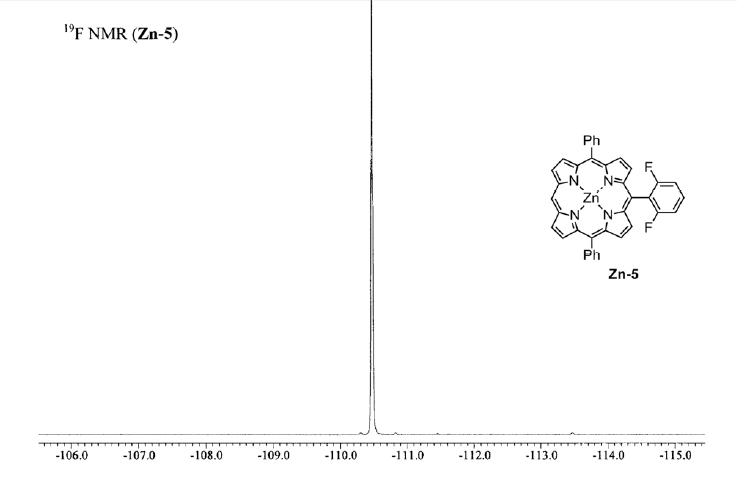


**Figure S44.** 1H NMR Spectra of Zn-6.


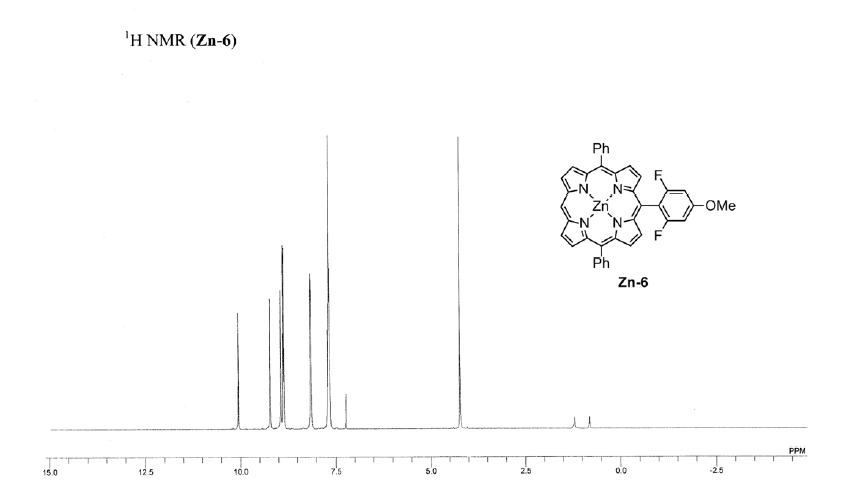


**Figure S45.** 13C NMR Spectra of Zn-6.


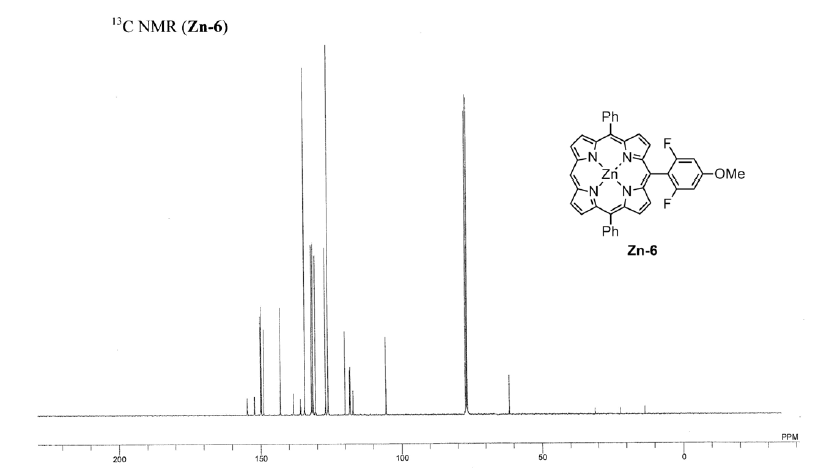


**Figure S46.** 19F NMR Spectra of Zn-6.


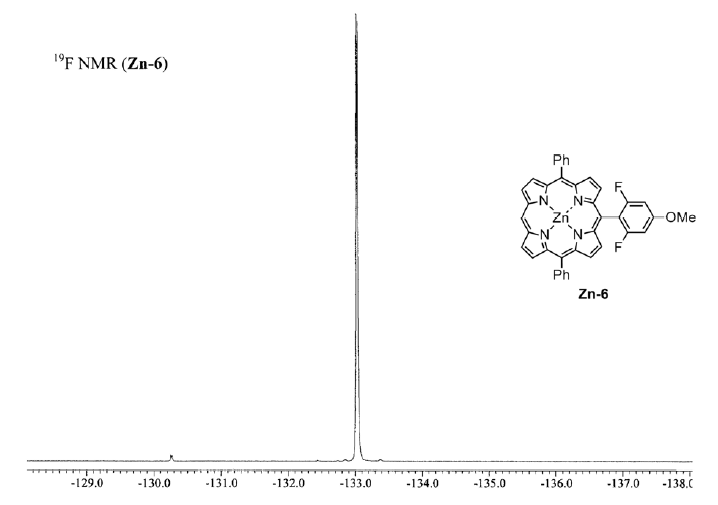


**Figure S47.** 1H NMR Spectra of Zn-7.


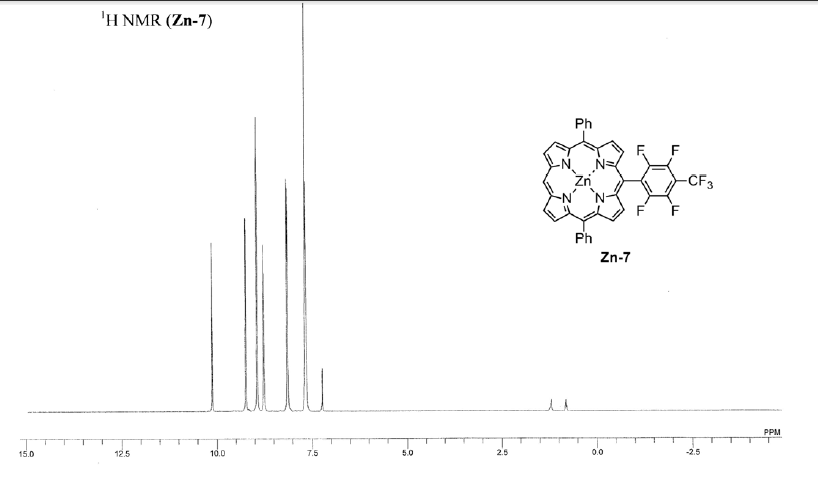


**Figure S48.** 13C NMR Spectra of Zn-7.


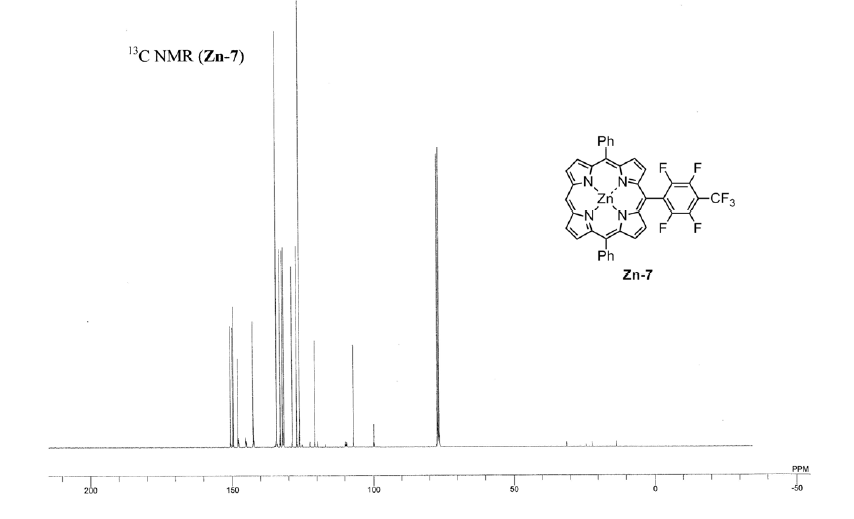


**Figure S49.** 19F NMR Spectra of Zn-7.

© 2013 by the authors; licensee MDPI, Basel, Switzerland. This article is an open access article distributed under the terms and conditions of the Creative Commons Attribution license (http://creativecommons.org/licenses/by/3.0/).
